# Supplementary material
Source: PubMed Central journal article supplement (PMC3454892)
Supplement: 933e448b03bf230b0e0c3382ada25817_genetics.112.141473-4.pdf [file 933e448b03bf230b0e0c3382ada25817_genetics.112.141473-4.pdf]

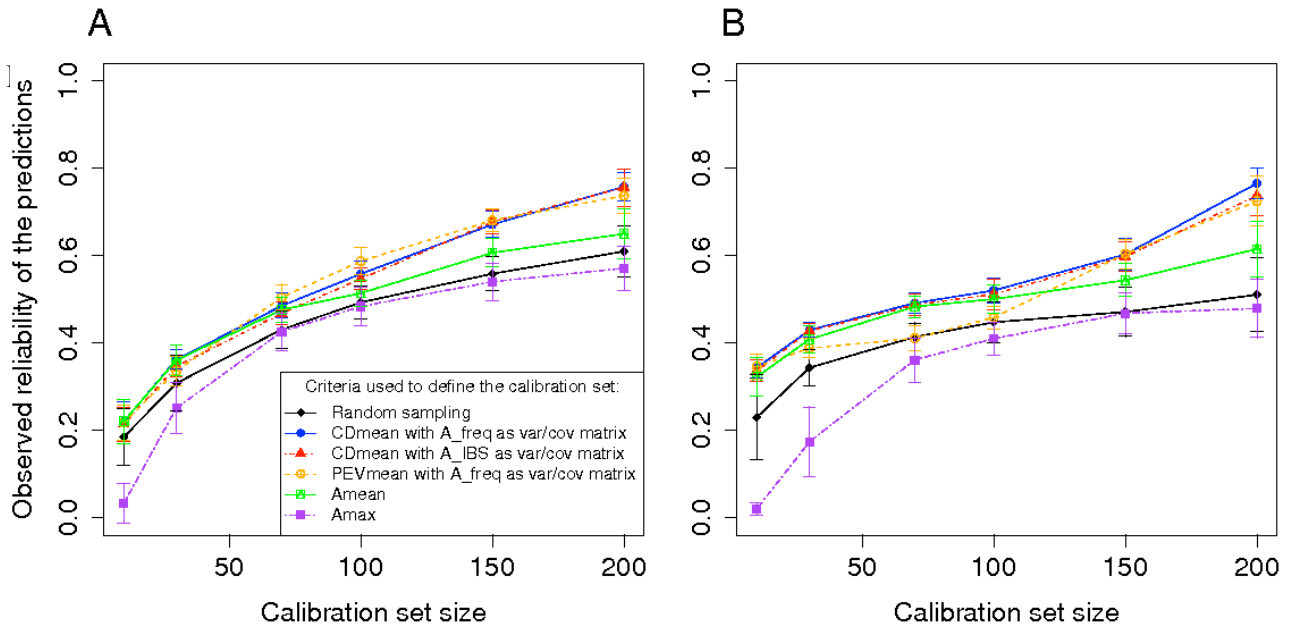

**Figure S1** Reliability of the predictions of Tass\_GDD6 using different sampling algorithms on the Dent panel (A) and the Flint panel (B) using a  $\lambda$  value corresponding to an heritability of 0.5. The calibration sets were randomly sampled, or defined by: maximizing CDmean with a relationship matrix based on the IBS or weighted by the allelic frequencies; minimizing PEVmean with a relationship matrix weighted by the allelic frequencies; minimizing the mean (Amean) or the maximum (Amax) of the relationship coefficient between the reference individuals. The individuals that are not in the calibration set are in the validation set. As a consequence for each calibration set size the reliability is calculated with a different number of individuals. For each point, the vertical line indicates an interval of  $2\sigma_R$  ( $\sigma_R$  being the standard deviation of observed reliabilities over the 50 runs).
